# Supplementary material
Source: PubMed Central journal article supplement (PMC5074605)
Supplement: supp_pp.16.01023_PP2016-01023DR1_Supplemental_Material_4tbls.pdf [file supp_pp.16.01023_PP2016-01023DR1_Supplemental_Material_4tbls.pdf]

1 **Table S1.** Accessions used for vernalization experiments.

| Accession         | Species                                       | Tribe          | Location             |
|-------------------|-----------------------------------------------|----------------|----------------------|
| USDA PI253581     | <i>Achnatherum bromoides</i> <sup>1</sup>     | Stipeae        | Israel               |
| USDA PI415826     | <i>Achnatherum calamagrostis</i>              | Stipeae        | Switzerland          |
| USDA PI325354     | <i>Achnatherum caragana</i>                   | Stipeae        | Stavropol,<br>Russia |
| USDA PI236879     | <i>Achnatherum hymenoides</i> <sup>1</sup>    | Stipeae        | Canada               |
| USDA PI578861     | <i>Achnella caduca</i>                        | Stipeae        | NDakota, USA         |
| USDA W625504      | <i>Agrostis mertensii</i> <sup>1</sup>        | Poeae I        | Greenland            |
| B&T World 62975   | <i>Ampelodesmos mauretanicus</i> <sup>1</sup> | Stipeae        | Unknown              |
| NGB14333          | <i>Anthoxanthum odoratum</i>                  | Aveneae        | Finland              |
| USDA PI314138     | <i>Boissiera squarrosa</i>                    | Triticeae      | Uzbekistan           |
| McKeown-VT-2015   | <i>Brachyleytrum aristosum</i>                | Brachyelytreae | Vermont, USA         |
| Kew 371232        | <i>Brachyleytrum erectum</i> <sup>1</sup>     | Brachyelytreae | Missouri, USA        |
| USDA PI170218     | <i>Brachypodium distachyon</i>                | Brachypodieae  | Turkey               |
| PI253334          | <i>Brachypodium distachyon</i>                | Brachypodieae  | Morocco              |
| USDA PI318958     | <i>Brachypodium phoenicoides</i> <sup>1</sup> | Brachypodieae  | Zaragoza,<br>Spain   |
| USDA PI325216     | <i>Brachypodium pinnatum</i> <sup>1</sup>     | Brachypodieae  | Stavropol,<br>Russia |
| USDA PI639821     | <i>Brachypodium ruprestre</i> <sup>1</sup>    | Brachypodieae  | Krym, Ukraine        |
| USDA PI204410     | <i>Briza minor</i> <sup>1</sup>               | Poeae          | Turkey               |
| NorGen NGB2875    | <i>Bromus inermis</i>                         | Triticeae      | Norway               |
| NorGen NGB7723    | <i>Dactylis glomerata</i>                     | Poeae II       | Norway               |
| USDA PI662331     | <i>Deschampsia cespitosa</i> <sup>1</sup>     | Poeae II       | Norway               |
| USDA W6 23553     | <i>Duthiea brachypodium</i>                   | Duthieae       | China                |
| Marcussen-NO-2015 | <i>Elymus caninus</i> <sup>1</sup>            | Triticeae      | Norway               |
| NorGen NGB2520    | <i>Festuca pratensis</i>                      | Poeae II       | Sweden               |
| Kew 380100        | <i>Glyceria occidentalis</i>                  | Meliceae       | Oregon, USA          |
| Ames29899         | <i>Glyceria striata</i>                       | Meliceae       | Unknown              |
| MSB 336026        | <i>Helictotrichon hookeri</i> <sup>1</sup>    | Poeae II       | Unknown              |
| MSB 65160         | <i>Helictotrichon pubescens</i> <sup>1</sup>  | Poeae II       | Unknown              |
| PI W6 37446       | <i>Hesperostipa comata</i>                    | Stipeae        | Utah, USA            |

|                  |                                              |           |                            |
|------------------|----------------------------------------------|-----------|----------------------------|
| USDA W6 27071    | <i>Hesperostipa neomexicana</i> <sup>1</sup> | Stipeae   | Colorado, USA              |
| USDA PI372565    | <i>Herperostipa spartea</i>                  | Stipeae   | Canada                     |
| PI614642         | <i>Hordeum bulbosum</i>                      | Triticeae | Ukraine                    |
| Sonja            | <i>Hordeum vulgare</i>                       | Triticeae | Unknown                    |
| MSB 235174       | <i>Hystrix patula</i>                        | Triticeae | Unknown                    |
| NorGen NGB4262   | <i>Lolium perenne</i>                        | Poeae II  | Norway                     |
| MSB 105167       | <i>Lygeum spartum</i>                        | Nardeae   | Egypt                      |
| USDA PI239234    | <i>Macrochloa tenacissima</i>                | Stipeae   | Tunisia                    |
| USDA W625184     | <i>Melica altissima</i>                      | Meliceae  | Kazakhstan                 |
| Kew 31675        | <i>Melica ciliata</i>                        | Meliceae  | Stereia Ellas,<br>Greece   |
| PI442519         | <i>Melica nutans</i>                         | Meliceae  | Belgium                    |
| PI619447         | <i>Melica transsilvanica</i>                 | Meliceae  | China                      |
| USDA PI478588    | <i>Nassella brachyphylla</i>                 | Stipeae   | Peru                       |
| USDA PI289543    | <i>Nassella hyaline</i>                      | Stipeae   | Buenos Aires,<br>Argentina |
| USDA W6 24255    | <i>Nassella leucotricha</i>                  | Stipeae   | Texas, USA                 |
| USDA PI237818    | <i>Nassella neesiana</i> <sup>1</sup>        | Stipeae   | Spain                      |
| USDA PI478575    | <i>Nassella pubiflora</i>                    | Stipeae   | Peru                       |
| USDA NSL439946   | <i>Nassella pulchra</i>                      | Stipeae   | California,<br>USA         |
| USDA PI387938    | <i>Nassella viridula</i> <sup>1</sup>        | Stipeae   | Alberta,<br>Canada         |
| B&T World 4393   | <i>Nardus stricta</i>                        | Nardeae   | Norway                     |
| USDA PI236875    | <i>Oryzopsis canadensis</i>                  | Stipeae   | Canada                     |
| Paris-VT-2013    | <i>Oryzopsis racemosa</i> <sup>1</sup>       | Stipeae   | Vermont, USA               |
| B&T World 448347 | <i>Phaenospermata globosum</i>               | Duthieae  | Unknown                    |
| USDA PI271588    | <i>Piptatherum aequiglume</i>                | Stipeae   | Himachal<br>Pradesh, India |
| USDA PI207500    | <i>Piptatherum coerulescens</i> <sup>1</sup> | Stipeae   | Afghanistan                |
| USDA PI249763    | <i>Piptatherum holciforme</i> <sup>1</sup>   | Stipeae   | Greece                     |
| USDA PI207772    | <i>Piptatherum miliaceum</i>                 | Stipeae   | Israel                     |
| USDA PI227453    | <i>Piptatherum songaricum</i> <sup>1</sup>   | Stipeae   | Iran                       |
| USDA PI266189    | <i>Piptochaetium avenaceum</i>               | Stipeae   | Jordan                     |

|                |                                   |          |                   |
|----------------|-----------------------------------|----------|-------------------|
| USDA PI202062  | <i>Piptochaetium napostense</i>   | Stipeae  | Argentina         |
| NorGen NGB1197 | <i>Poa alpina</i>                 | Poeae II | Sweden            |
| USDA PI384952  | <i>Stipa barbata</i> <sup>1</sup> | Stipeae  | Iran              |
| MSB 428103     | <i>Schizachne purpurascens</i>    | Meliceae | Wisconsin,<br>USA |

2 <sup>1</sup>NF, generally non-flowering in both treatments

3

4 **Table 2.** Summary statistics for linear mixed effects models calculating the influence of  
5 time point and temperature on *VRN1* and *VRN3* expression.

| Factors/Species   | <i>N. pulchra</i>      | <i>N. pubiflora</i>  | <i>M. nutans</i>      | <i>M. ciliata</i>     | <i>N. stricta</i>     | <i>B. aristosum</i>    |
|-------------------|------------------------|----------------------|-----------------------|-----------------------|-----------------------|------------------------|
| <i>VRN1</i>       |                        |                      |                       |                       |                       |                        |
| Timepoint (Ti)    | 11.21 <sub>2</sub> *** | 0.12 <sub>2</sub>    | 3.79 <sub>2</sub> *   | 3.81 <sub>2</sub> *   | 2.96 <sub>2</sub>     | 18.57 <sub>2</sub> *** |
| Treatment (Tr)    | 40.99 <sub>1</sub> *** | 6.53 <sub>1</sub> *  | 3.28 <sub>1</sub>     | 0.70 <sub>1</sub>     | 4.01 <sub>1</sub>     | 15.34 <sub>2</sub> **  |
| Ti*Tr             | 9.71 <sub>2</sub> ***  | 0.16 <sub>2</sub>    | 6.50 <sub>2</sub> **  | 0.09 <sub>2</sub>     | 10.22 <sub>2</sub> ** | 5.40 <sub>2</sub> *    |
| PRE vs. 4 wk cold | 2.919**                | NA                   | 1.856                 | NA                    | -0.19                 | 0.952                  |
| PRE vs. 4 wk warm | -0.015                 | NA                   | 0.631                 | NA                    | 0.43                  | -0.23                  |
| PRE vs. 6 wk cold | 6.453***               | NA                   | 4.37***               | NA                    | 4.05***               | 5.912***               |
| PRE vs. 6 wk warm | 0.224                  | NA                   | -0.531                | NA                    | -0.48***              | 1.548                  |
| <i>VRN3</i>       |                        |                      |                       |                       |                       |                        |
| Ti                | 59.39 <sub>2</sub> *** | 0.91 <sub>2</sub>    | 0.630 <sub>2</sub>    | 7.91 <sub>2</sub> *   | 1.63 <sub>1</sub>     | 5.00 <sub>1</sub>      |
| Tr                | 49.34 <sub>1</sub> *** | 9.66 <sub>1</sub> ** | 12.08 <sub>1</sub> ** | 5.83 <sub>1</sub> *   | 1.94 <sub>1</sub>     | 5.18 <sub>1</sub>      |
| Ti*Tr             | 49.02 <sub>2</sub> *** | 6.95 <sub>2</sub> *  | 5.287 <sub>2</sub> ** | 23.10 <sub>2</sub> ** | 1.31 <sub>1</sub>     | 5.18 <sub>1</sub> *    |
| PRE vs POST cold  | 10.4***                | 1.189                | 1.064                 | 1.411                 | NA                    | 4.000***               |
| PRE vs POST warm  | 0.498                  | -2.535*              | -2.187*               | -5.387***             | NA                    | -0.379                 |

6

7 F-statistic with number of degrees of freedom is indicated as the subscript. When no time  
8 point by treatment interaction was observed, further contrasts were not conducted and are  
9 indicated with NA. \*  $P < 0.05$ , \*\*  $P < 0.01$ , and \*\*\*  $P < 0.001$

10

11

12 **Table S3.** Summary statistics for linear mixed effects models calculating the influence of  
 13 early time point and temperature on *VRN3* expression.

| Factors/Species       | <i>M. ciliata</i> | <i>N. pubiflora</i> |
|-----------------------|-------------------|---------------------|
| Timepoint (Ti)        | 4.531**           | 3.104*              |
| Treatment (Tr)        | 0.1518            | 0.0559              |
| Ti*Tr                 | 0.7445            | 1.889               |
| 2 versus 4 weeks cold | -1.367            | 1.217               |
| 2 versus 5 weeks cold | -1.718            | 0.986               |
| 2 versus 6 weeks cold | -1.730            | 0.320               |
| 2 versus 7 weeks cold | -3.553***         | 1.599               |
| 2 versus 4 weeks warm | 0.720             | 3.189**             |
| 2 versus 5 weeks warm | -0.231            | 2.858**             |
| 2 versus 6 weeks warm | -1.185            | 3.204**             |
| 2 versus 7 weeks warm | -1.857            | 2.227*              |

14 F-statistic with number of degrees of freedom is indicated as the subscript. \*  $P < 0.05$ , \*\*  
 15  $P < 0.01$ , \*\*\*  $P < 0.001$

16

17 **Table S4.** Primers used for *VRN1* and *VRN3* cloning and q-RT-PCR. All q-RT-PCR  
 18 primer efficiencies were between 90-110%.

| Primer              | Primer sequence (5' - 3')  | Taxa                |
|---------------------|----------------------------|---------------------|
| <i>Cloning</i>      |                            |                     |
| VRN3_23f            | ACCCGCTGGTGGTTGGYAGGGT     | All                 |
| VRN3_115f           | GTGTCCAAGGCTGCGAGCTCA      | All                 |
| VRN3_445r           | GTAGAGCTCGGCGAAGTC         | All                 |
| VRN1_34f            | GAGAACAAGATCAACCGSCAGGT    | All                 |
| VRN1_100_f          | GAGATCTCCGTGCTCTGCGAC      | All                 |
| VRN1_478_r          | TTATTCTCCTCCTGCAGTGA       | All                 |
| VRN1_799_r          | CTCASCATCCAYGGTGGMAGCCC    | All                 |
| Melica_VRN3_139f    | GCTYAAGCCCTCCATGGT         | <i>Melica</i>       |
| Melica_VRN3_1324r   | TAGAGCTCGGCGAAGTCC         | <i>Melica</i>       |
| <i>qPCR</i>         |                            |                     |
| Grass_UBQ5_F        | CGCCGACTACAACATCCAG        | All species         |
| Grass_UBQ5_R        | TCACCTTCTTGTGCTTGTGC       | All species         |
| Lolium_EF1alphaF    | CCTTGCTTGAGGCTCTTGAC       | All species         |
| Lolium_EF1alphaR    | GTTCCAATGCCACCAATCTT       | All species         |
| cMelica_VRN3_401_f  | TGGTCACTGATATCCCTGGAA      | <i>Melica</i>       |
| cMelica_VRN3_612_r  | AACAGCACGAACACGAAGC        | <i>Melica</i>       |
| Melica.qVRN1.384.f  | GCACCTCATGGGAGAGGATA       | <i>Melica</i>       |
| Melica.qVRN1.477.r  | GCTGGCTCTTTCTGGATCTG       | <i>Melica</i>       |
| NassPul_qVRN3_61_f  | GTGCTGGACCCCTTCGTC         | <i>N. pulchra</i>   |
| NassPul_qVRN3_743_r | GAGCATCCGGGTCTACCAT        | <i>N. pulchra</i>   |
| NassPul_qFUL1_f     | TAAGGTTCTACAGAAGGAACCTCGTG | <i>Nassella</i>     |
| NassPul_qFUL1_r     | GCCGCTGGGTACCTGATATT       | <i>Nassella</i>     |
| NassPub_VRN3_1012_f | GCAGGAGGTGGTATGCTACG       | <i>N. pubiflora</i> |
| NassPub_VRN3_1304_r | CCCTGGTGTGAAGTTCTGG        | <i>N. pubiflora</i> |
| NarStr.FT1a.q.F.B   | CTGGTGGTTGGTAGGGTTGT       | <i>N. stricta</i>   |
| NarStr.FT1a.q.R.B   | AAGATTAGGGTCGCTTGGGC       | <i>N. stricta</i>   |
| NarStr.FUL1q.F.A    | GTCGCGCTCATCATCTTCTC       | <i>N. stricta</i>   |
| NarStr.FUL1q.R.A    | TTCGTGACACCTATTGCCCT       | <i>N. stricta</i>   |

---

|                   |                      |                     |
|-------------------|----------------------|---------------------|
| Brachyrec.FUL1q_f | AGAAGCAGAAGGCCCATACA | <i>B. aristosum</i> |
| Brachyrec.FUL1q_r | CGTCCTCTCCCCTCTCTCC  | <i>B. aristosum</i> |
| ByaVRN3.q.B_f     | CAGGAGGTCATGTGCTACGA | <i>B. aristosum</i> |
| ByaVRN3.q.B_r     | ATTGTAGAGCTCGGCGAAGT | <i>B. aristosum</i> |

---

19
