# Supplementary material
Source: PubMed Central journal article supplement (PMC5074605)

Tillers at Flowering

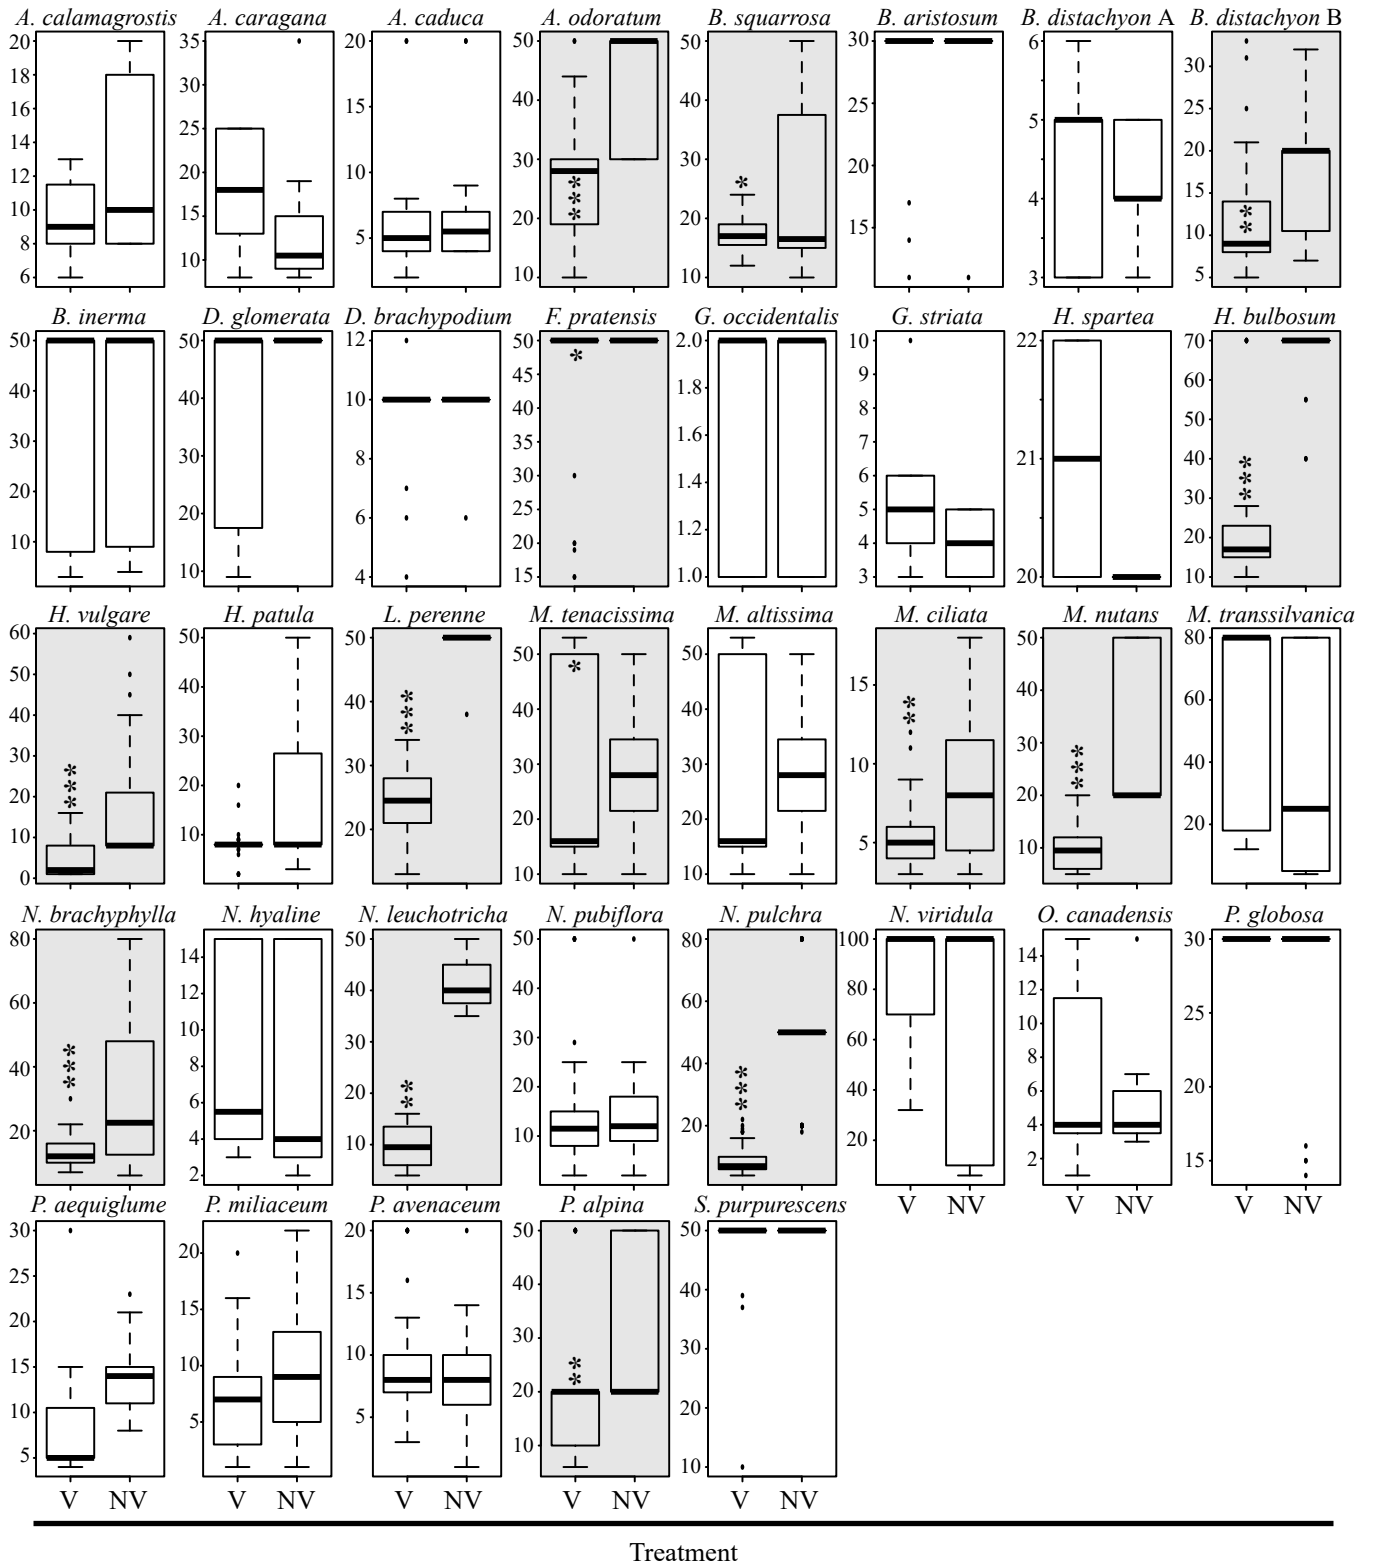

Supplement: supp_pp.16.01023_PP2016-01023DR1_Supplemental_Material_1.pdf [file supp_pp.16.01023_PP2016-01023DR1_Supplemental_Material_1.pdf]

**A**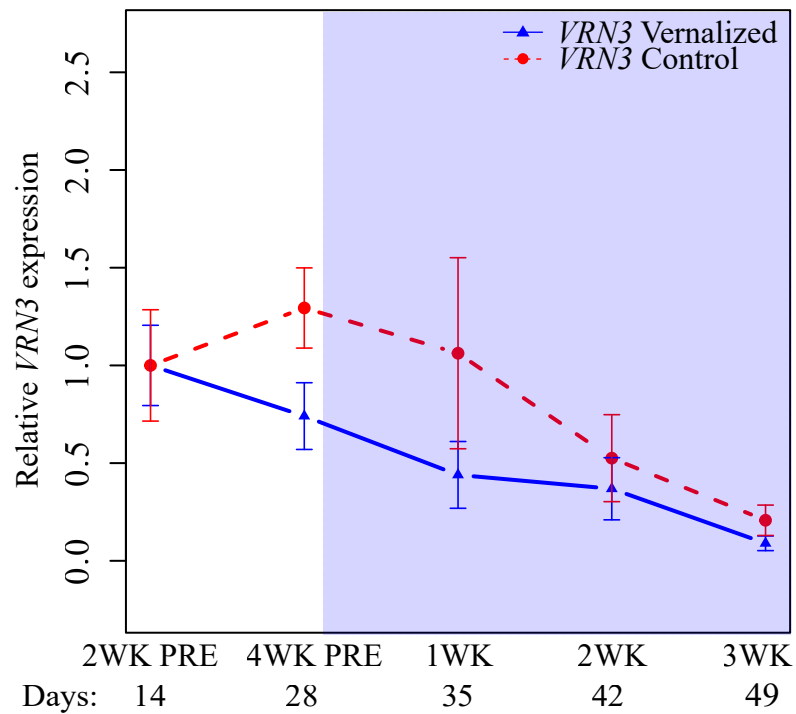**B**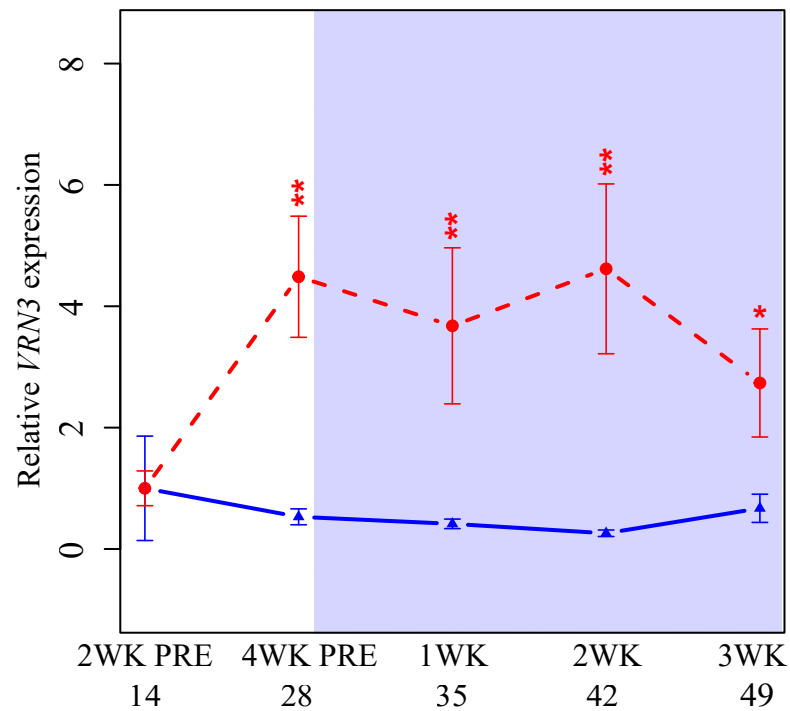

Supplement: supp_pp.16.01023_PP2016-01023DR1_Supplemental_Material_3.pdf [file supp_pp.16.01023_PP2016-01023DR1_Supplemental_Material_3.pdf]
